# Supplementary material
Source: Springer Nature journal article supplement (https://www.springermedizin.de/resource/supplementary/12960_2003_12_MOESM6_ESM.pdf/9569728)

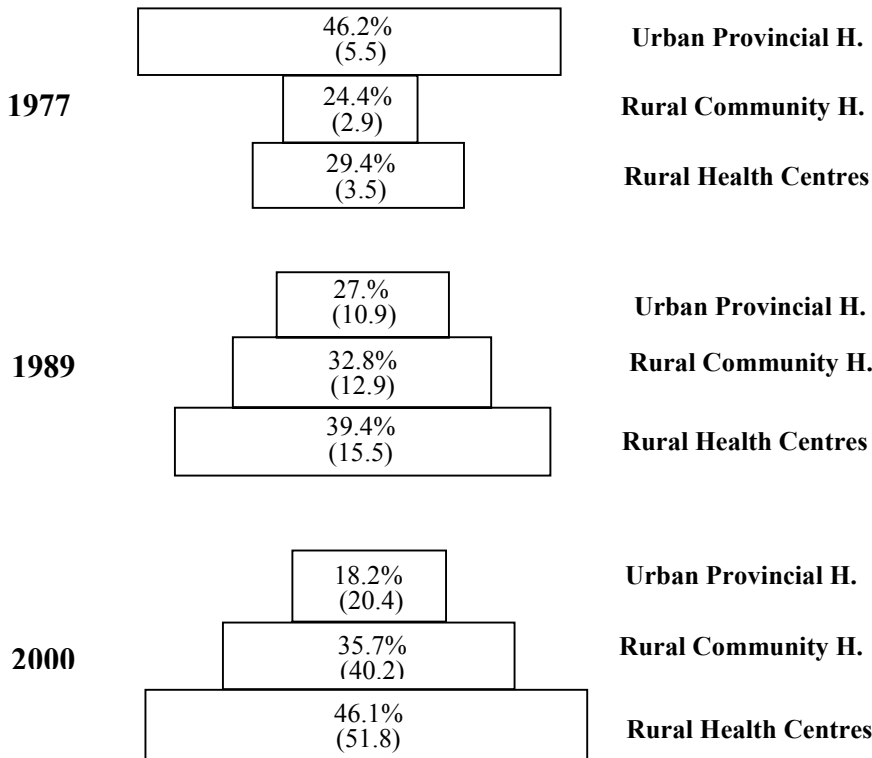

( ) : Number of OPD visits (millions)

Source: Rural Health Division, MoPH.

Supplement: MOESM6 [file 9569728]
